# Supplementary material for: Streamflow estimation at partially gaged sites using multiple dependence conditions via vine copulas
Source: Copernicus journal article supplement (doi:10.5194/hess-2020-541), 2020-12-07
Supplement: Supplementary file [file hess-2020-541-AC1-supplement.pdf]

< REPLY TO REVIEWER 1 >

- **Title: Streamflow estimation at partially gaged sites using multiple dependence conditions via vine copulas**
- **Authors: Kuk-Hyun Ahn**

**((Acknowledgement))** The authors sincerely thank the reviewer for their helpful and constructive comments.

**((Comment #1))**

In the abstract, it is better to present the improvement percentage of the superior model compared to other models.

**((Reply))**

The point of the reviewer is well taken. During the revision of the paper, the improvement percentage will be provided in the abstract.

**((Comment #2))**

Choose keywords that do not match the title of the manuscript.

**((Reply))**

Keywords will be modified based on the title of the manuscript.

**((Comment #3))**

The conclusion section should be more concise and the main results should be presented.

**((Reply))**

After re-reading our previous manuscript, I realized that the conclusion did not provide enough detail about the main results to summarize the draft. More summary statement will be inserted in the conclusion.
